# Supplementary material for: Single-cell transcriptomics reveals gene expression dynamics of human fetal kidney development
Source: PLoS Biol. 2019 Feb 21;17(2):e3000152. doi: 10.1371/journal.pbio.3000152 (PMC6400406; doi:10.1371/journal.pbio.3000152)
Supplement: S5 Table — smFISH, single molecule fluorescence in situ hybridization. (XLS) [file pbio.3000152.s015.xls]

## Sheet: probes
Gene	Probe sequence 5' to 3'
CITED1	attagcacatgtcctggc
	tataaccggcttagggca
	ggctaggaatcccaggaa
	acacggcagcagactggc
	gagagccctgacgcacac
	cggggcgcctgggaaaag
	cgaaccggtcgcgctcag
	cctggagagagggaagcg
	gttgtgctctgagaagcc
	cccttgacatcaagtgca
	tccttcgcaggtgaggtg
	ctcatctcttggttggca
	aaggttggagtaggccac
	gctttgcgatctttcacc
	ggtagtgcagaatggcca
	gaggaactagtgggagcc
	gtaggagagcctattgga
	ggtttagtgggaggggtg
	gggtgcaggttgaaggat
	ctagccagcaagtgaggg
	aagtcccagttttgcagg
	agagagtgattctgcccc
	ctctgggcaccagcagaa
	gtccgaatcgatgatagc
	cagcacttcctcatccac
	agttccaccaccagcgac
	agctccggaagctcattg
	agtccgcagtgaagtcaa
	cacttggcattagcagct
	tggctttattcctccatc
CLIC5	gaaagccgggttaagggaat
	atgaaaaggagcgaagccgg
	agagatcagtgtcccagatg
	cagggcggtgtttaattttt
	cacaaagagctcgatctcgg
	gatgctttctccatcgattc
	gcgctgagagaaaggacagt
	tcagccagaggatcatgaag
	gtgacattgaacacgactcc
	ctttcttttcagatccacag
	actcctcgatcttattgacg
	cagtttggggtacttttcag
	tggaaaagatgtcgatgccc
	caggtagtcatccaatttct
	cacaagtgttggcgtcaatc
	ccacaatcttgaccacatgg
	gggatatcatagttgcggta
	cataggcgttcttgaggtac
	acaggtgttggtgaactcat
	caactcgatctcactgtcag
	caaaatggctgtgctcagga
	gaggagtctatgaagctgga
	taaaaagtgcgcctcaaggc
	tgataccagcaagatgaggc
	gaaagatagcaggctggagt
	tgctagattcctatgtgagg
	aaggtggactgtgtctatca
	gcagaagaagctagtggcaa
	aaggagttggtgttgcatgt
	taggtatggacggagaggag
	gagactgaagctgtgtttgc
	ttagtgcccaataaccagag
	tcaagtgactttccagtctg
	ctggcactgcaacaaactga
	agaattgcatgccaatttcc
	gtgggtattttggcatcaac
	cctctgaaacaactactcct
	cactcattggtaagcacagt
	ccactttctcatagctcaaa
	ccagtccaagacttagatca
	ggttagcagttacatgatgc
	gacatttttgacccattctt
	ccagaagcagcttggagaaa
	ttttacccattacaggctac
	atcagaccacctcctaaatg
	ctcatggactttcttcctaa
	tcaaaccacatggtttccta
	gcagttgagtcagattgtag
OLFM3	tccggcaaacaaagacagca
	tctgagtcttggaaggatct
	catcaggatcctgagctgag
	acaactgtgcaaatgcaccg
	acacaggttttgttctggag
	agacttcaatagactgggac
	tctctctgagttctcaagtt
	aaattttgccttcagccctt
	ttcgatcatcttcaatctgc
	aaatgcttggtcataagtgt
	cattttctctttcaactcct
	ggatcaaaggcaggagctcg
	tgttttgtactgttccagca
	actgggtgattaacttagca
	gacagattccttatttcctc
	ctgaataccagtgaggacag
	agtcataggcaccaatttcc
	actctttggtgtagttcctc
	aagtcttgtttccaagctca
	ttagctttttcatgcagtca
	attttcatcagtttgccaca
	cttgactgtaactgggcctg
	caccaaatcgggttccagat
	atgctaaagggtctgtcatc
	taactgtccatgtaccagac
	ccactgacaaagtctgcaat
	aggttgtatgtccttgattc
	tagttcctgcccacttgaaa
	gtgagccattgtagacaaca
	ccccatatcaaagctgtatt
	cgatgtcagagaatccaccc
	ccgatttcatcagccattag
	tctggttagttgcatacaca
	tggctgatgacaatattgcc
	ctccaaggtatcttggttaa
	agtgggagttggtgacatac
	aataatacaccttggctcca
	gtggaggttttggtggaata
	gggaatgtctgtgtactcat
	attgttccaggcatagagag
	gtgacattgaacagcacctg
	cctctgtcttgatgatatgg
MAFB	tctagctctcttgctcttac
	gaagtcgttgacatactcca
	ttcacgtcgaacttgagcag
	gagctacacggagtgctgag
	cagtacagatcctcgaggtg
	ggttcatctgctggtagttg
	aaagctgtcgaagctttgca
	acatggacacgagctggtcg
	tttatacctgcaagactggg
	tgaatgagctgcgtcttctc
	tctcgcacttgaccttgtag
	ctctgctcgagtctaggagg
	ggtgacttctcgggactatg
	ggcttaacgcgcaaagttca
	cgaactctgacagacaggtc
	gggagtatgatccatgatca
	ccttctcacccaaagaaaca
	gtatttacaagcctacagct
	cacgttctctatgcggtttg
	aacccaaacaaagaccctca
	ttttctgatgcaaaatgccc
	aagtgtgccccaagacaaag
	aaagaggaccgaatggggat
	tcagcaccaacaaggttgaa
	aaggctgtagtccagaacac
	agggtatcaatttgaccata
	cagggtgattctggttacaa
	ccagagggttcagaagggac
	tgtggctcctacaattagcg
	cagggtcagggatggctaag
	ttggttcagtgcagtgtctg
	tggtacattctgagcatagc
	attacttgccaatgtttggg
	gcattggtctaaagaacgca
	cagtgcaacttaaatccttt
	gccagcaatttcaaatggga
	tcaaaaatgcatccggccag
	cggttcatacaatcttgtta
	atttaaaactgcaagcacca
	tcgtttctgatgcaggacaa
	cggcaggtttgatttcaaca
EGR1	aacactgagaagcgtgcagg
	aacgggtcagagatctgcag
	tgggcgagtgaggaaaggat
	acaaggtgttgccactgttg
	aaatgggactgctgtcgttg
	aaaatgtcagtgttcggcgt
	ggatcatgggaacctggaag
	tgctgtggaaacaggtagtc
	agacagaggggttagcgaag
	tgagtggcaaaggccttaat
	agaagcggcgatcacaggac
	cgcaagtggatcttggtatg
	gacgggtaagaggtagcaac
	ggggatggataagaggtagt
	cacaggggatgggtatgagg
	gaggaagggaagctgctgac
	gctgaaggagttggtgacag
	gttgctgtcatgtccgaaag
	atttcaattgtcctgggaga
	tccatctgacctaagaggaa
	cagtagagagggaggacttg
	aggattgttggccaatagac
	aattggggaaggggaagtgg
	gcagctgaagtcaaagggaa
	agttctttggatagaggtga
	caggcatatgatggagatga
	agcattgaagggagcaaggg
	ccattttgccaactcgattt
	cacagacactgtacaagggt
	gagtaccccaagaaaaacga
	agaggatcaccattggtttg
	attgtcacagcatcatcaca
	acaacactctgacacatgct
	acggtcaagcagtatttaca
	gcaccaagacgtgaaacttt
	agcaaggcgcatcacacaaa
	acaattgcacatgtcaagcc
	taaggctagaggtgagcatg
	tccttattttgctcccaaag
	tctggagaaccgaagctcag
	gcctactcagtaggtaacta
	gccaaacagtcactttgttt
	tgggcaataaagcgcattca
SIX2	tcccacgaagctccgaac
	gagtcactgccgtacgtc
	cgcatgggagcttcctcg
	aaggtgggcagcatggac
	acttgctcctgcgtgaag
	tgcagcacctcgcacacg
	cagcgaccacaggaagcg
	tgtgaaggtgctcgcagg
	ccttgagcacgctttcat
	ggatcttgtagagctcgc
	tggttgtgcggcgagaac
	ttctccgcctcgatgtag
	cacgcggtatttgcccac
	cggcagcgggaatttgcg
	gcgactcttttccttgaa
	taccactcgcgcagcacg
	gaagggtaggggttgtgc
	cagctcacgcttctcgcg
	gacctgtgtggtggtgag
	gagttctcgttgttctcc
	cgggttgtggctgttaga
	taacaccgacttgccgct
	atggtggtgttgcagtgg
	gaggatggagtcctgcag
	gaggttggctgacatggg
	tgggttctaggagcccag
	ggcaagctcatcaaggca
	cccagtgtcaagtcacaa
	ctgcgggtctttcagtac
	atagacagctatctgccc
	ggaccaggacacagagta
	agacaggggtacatacgg
	accaccagtcaggaggag
	ccagaggtaggggcagat
	cctactccggtaaagcga
	cctaggttcaaagtccct
	gcgagggaaaaggcctca
	cgtttaggggcttctgtg
	gaggaagagcgcggtgtg
	agcgctgtagtcacagtc
	agggcattacggggagac
	tcccgaagaacattcaca
